# Supplementary material for: Mitochondria regulate intracellular coenzyme Q transport and ferroptotic resistance via STARD7
Source: PubMed Central journal article supplement (PMC9928583; doi:10.1038/s41556-022-01071-y), 2023-01-19

# Extended Data Fig. 3

**a**

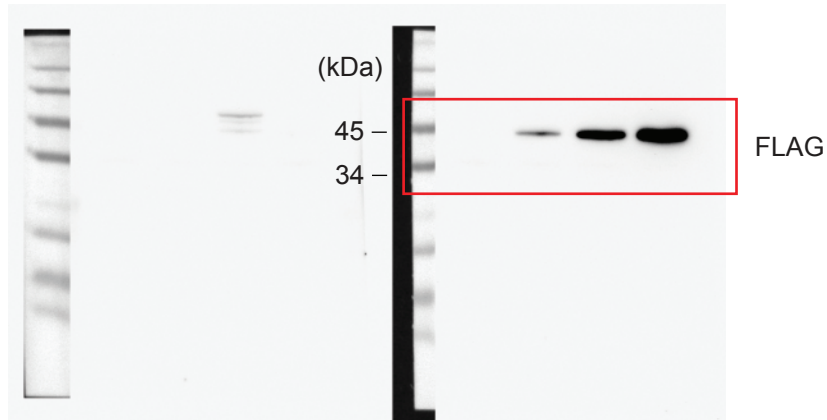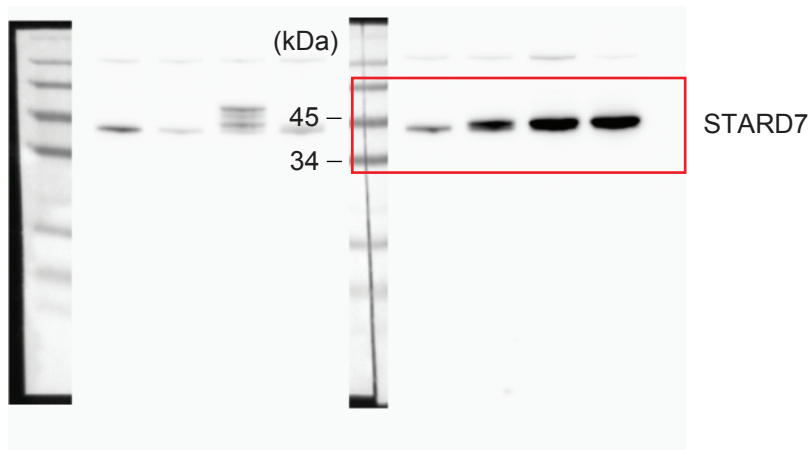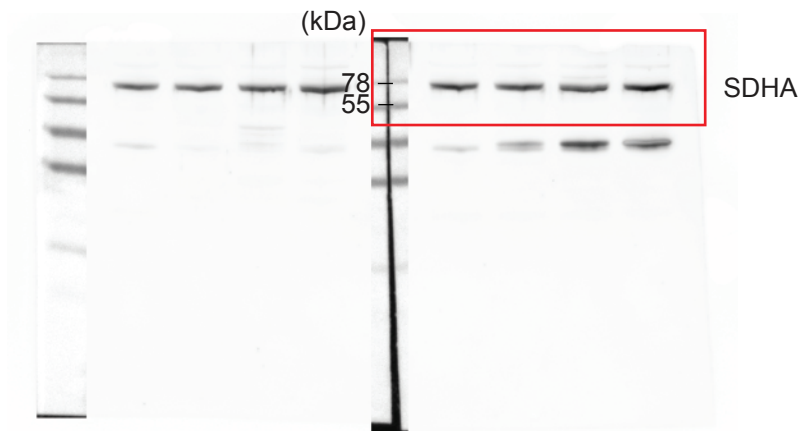

Supplement: 41556_2022_1071_MOESM15_ESM.pdf [file 41556_2022_1071_MOESM15_ESM.pdf]
