# Supplementary material for: Mitochondria regulate intracellular coenzyme Q transport and ferroptotic resistance via STARD7
Source: PubMed Central journal article supplement (PMC9928583; doi:10.1038/s41556-022-01071-y), 2023-01-19
Supplement: 41556_2022_1071_MOESM17_ESM.pdf [file 41556_2022_1071_MOESM17_ESM.pdf]

# Extended Data Fig. 4

**a**

(kDa)

105 —

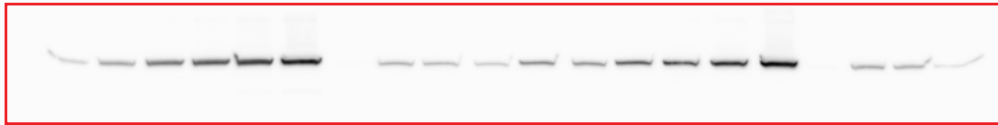

Transferrin

(kDa)

34 —

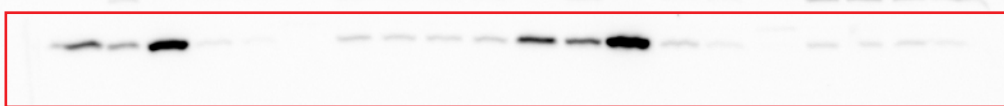

CLPP

# Extended Data Fig. 4

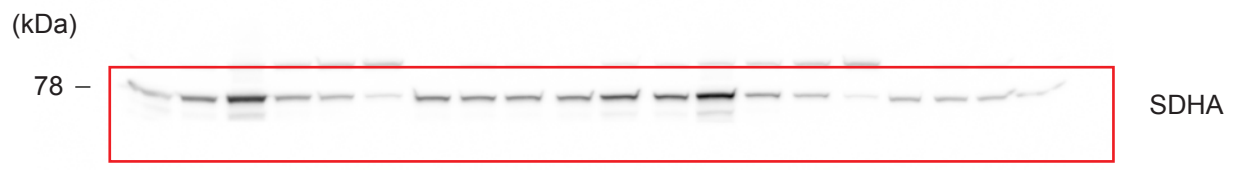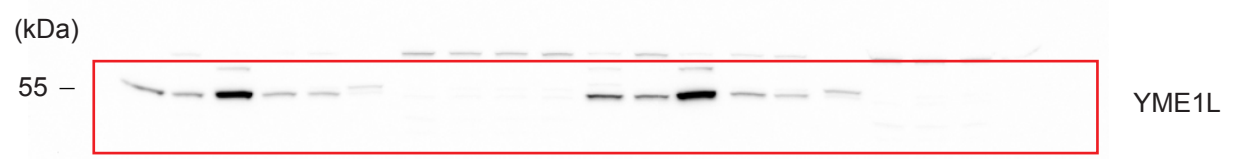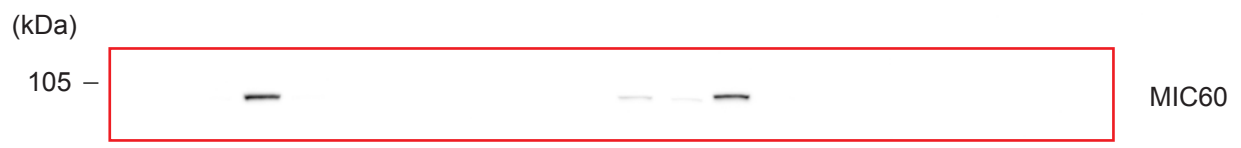

Extended Data Fig. 4

(kDa)

34 -

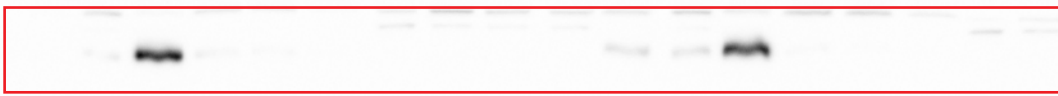

VDAC2

(kDa)

45 -

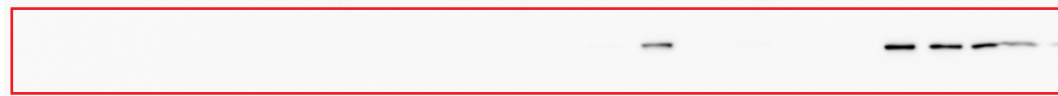

FLAG
